# Supplementary material for: A 20-core copper(i) nanocluster as electron–hole recombination inhibitor on TiO2 nanosheets for enhancing photocatalytic H2 evolution
Source: Royal Society of Chemistry journal article supplement (doi:10.1039/d1nr04683g), 2021-01-01
Supplement: d1nr04683g1.pdf [file d1nr04683g1.pdf]

***Supporting Information***

**A 20-core copper(I) nanocluster as electron-hole  
recombination inhibitor on TiO<sub>2</sub> nanosheet for enhancing  
photocatalytic H<sub>2</sub> evolution**

Yun-Dong Cao,<sup>a</sup> Hui-Ping Hao,<sup>b</sup> Hua-Shi Liu,<sup>a</sup> Di Yin,<sup>a</sup> Ming-Liang  
Wang,<sup>a</sup> Guang-Gang Gao,<sup>\*a</sup> Lin-Lin Fan,<sup>a</sup> and Hong Liu<sup>\*a</sup>

*a. School of Materials Science and Engineering, University of Jinan, Jinan, 250022, P. R. China.*

*b. College of Pharmacy, Jiamusi University, Jiamusi 154007, P. R. China.*

*E-mail: mse\_gaogg@ujn.edu.cn; mse\_liuh@ujn.edu.cn*

# Contents

## Materials

## Experimental methods

## Characterization methods

## Calculation methods

## Supporting Figures

**Fig. S1** Ball-stick representation of 20-core copper(I) cluster in **UJN-Cu<sub>20</sub>** with labeling of asymmetric copper atoms.

**Fig. S2** Top (a, c, e, g) and side (b, d, f, h) views of the Cu<sub>7</sub> belts, equatorial belt, and the whole Cu<sub>20</sub> cluster in **UJN-Cu<sub>20</sub>** with ligand atoms being omitted for clarity (color codes: Cu, yellow; O, red).

**Fig. S3** Coordination mode of ethinylestradiol ligand.

**Fig. S4** TEM (a) and HR-TEM (b) images of anatase **TiO<sub>2</sub>-NS**.

**Fig. S5** XRD pattern of **TiO<sub>2</sub>-NS** which is consistent with the characteristic peaks of anatase TiO<sub>2</sub>.

**Fig. S6** FTIR spectra of **UJN-Cu<sub>20</sub>**, **UJN-Cu<sub>20</sub>@TiO<sub>2</sub>-NS**, and **TiO<sub>2</sub>-NS**.

**Fig. S7** Elemental mapping images of **UJN-Cu<sub>20</sub>@TiO<sub>2</sub>-NS**.

**Fig. S8** Turnover numbers and turnover frequency of **UJN-Cu<sub>20</sub>@TiO<sub>2</sub>-NS** catalyst.

**Fig. S9** Stability test of photocatalytic hydrogen evolution of **UJN-Cu<sub>20</sub>@TiO<sub>2</sub>-NS** catalyst.

**Fig. S10** TEM image of **Cu<sub>14</sub>@TiO<sub>2</sub>-NS**.

**Fig. S11** Comparison of photocatalytic H<sub>2</sub> evolution properties between **UJN-Cu<sub>20</sub>@TiO<sub>2</sub>-NS** and **Cu<sub>14</sub>@TiO<sub>2</sub>-NS**.

**Fig. S12** Band gap of **TiO<sub>2</sub>-NS** calculated by UV-visible absorption spectra.

**Fig. S13** Valence band XPS spectra of **UJN-Cu<sub>20</sub>** (a) and **TiO<sub>2</sub>-NS** (b).

**Fig. S14** Fluorescence spectra of terephthalic acid with addition of **UJN-Cu<sub>20</sub>@TiO<sub>2</sub>-NS**.

## Materials

The metal precursors  $\text{Cu}(\text{CO}_2\text{CH}_3)_2 \cdot \text{H}_2\text{O}$  (98 mol%, Sigma-Aldrich) and copper powder (Aladdin),  $\text{NH}_4\text{VO}_3$  (99 mol%, Macklin) and titanium butoxide (99 mol%, Macklin) were used without further purification. Ethinylestradiol ligand was purchased from Macklin. Acetonitrile was used as analytical grade and was not further purified. Fluoric acid was obtained from Supelco.

## Experimental methods

### 1. Synthesis of UJN-Cu<sub>20</sub>

UJN-Cu<sub>20</sub> was prepared by solvothermal technique using acetone as solvent. Based on the principle of disproportionation reaction, 0.0572 g (0.9 mmol) of Cu(0) powder and 0.0615 g (0.308 mmol) of  $\text{Cu}(\text{OOCCH}_3)_2$  salt were simultaneously introduced into the reaction system to produce copper(I) ion. After two hours of stirring in the presence of 0.2994 g (0.5 mmol) ethinylestradiol ligand, the reaction system was added with  $\text{NH}_4\text{VO}_3$  aqueous solution and stirred for 24 hours. After heating at 80 °C for 48 h, golden block crystals can be obtained in a 40% yield.

### 2. Synthesis of TiO<sub>2</sub>-NS

TiO<sub>2</sub>-NS were synthesized by a modified method.<sup>[1]</sup> In a typical synthetic procedure,  $\text{Ti}(\text{O}i\text{Bu})_4$  (5 mL) was carefully added into a 20-mL

Teflon-lined autoclave containing HF (2 mL, 40 wt %), and gently stirred for 30 min. The resulting mixture was treated at 200 °C for 24 h via a solvothermal process. After cooling down to room temperature naturally, the precipitate was collected by centrifugation and alternatively washing with ethanol and deionized water three times, and then dried under vacuum at 80 °C for 12 h.

### 3. Synthesis of UJN-Cu<sub>20</sub>@TiO<sub>2</sub>-NS

The TiO<sub>2</sub>-NS were dried at 200 °C for 1 hour to remove the adsorbed water on the surface. The dried nanosheets were added into the acetone solution of UJN-Cu<sub>20</sub> and quickly stirred at room temperature for 6 hours. During the stirring process, it was observed that the light-yellow solution gradually became transparent and the white precipitate gradually turned yellow, which proved that UJN-Cu<sub>20</sub> was loaded on the surface of TiO<sub>2</sub>-NS.

### Characterization methods

Single-Crystal X-ray Diffraction Analysis measurements were performed on a Rigaku XtaLAB Pro diffractometer with Mo-K $\alpha$  radiation ( $\lambda = 0.71073 \text{ \AA}$ ) at 293 K for UJN-Cu<sub>20</sub>. Data collection and reduction were performed using the program CrysAlisPro<sup>[2]</sup>. The intensities were corrected for absorption using the empirical method implemented in SCALE3 ABSPACK scaling algorithm. The structures were solved with

intrinsic phasing methods (*SHELXT-2015*)<sup>[3]</sup>, and refined by full-matrix least-squares on  $F^2$  using *OLEX2*,<sup>[4]</sup> which utilizes the *SHELXL-2015* module.<sup>[4]</sup> The crystal structures are visualized by *DIAMOND 3.2*.<sup>[5]</sup> Crystallographic data of **UJN-Cu<sub>20</sub>** was delivered to the Cambridge Crystallographic Data Centre (CCDC) and assigned No. 2091492.

Powder X-ray diffraction (XRD) was performed using a D8 Discover (Bruker) diffractometer in Bragg-Brentano geometry (Cu  $K\alpha$  radiation,  $\lambda = 1.5418 \text{ \AA}$ ). Data was recorded for the  $2\theta$  range from  $5^\circ$  to  $80^\circ$  in steps of  $0.05^\circ$  using an integration time of 1 s. The FTIR spectra were measured on a Nicolet 6700 spectrophotometer using KBr pellets in the range of 4000 to  $500 \text{ cm}^{-1}$ . The X-ray photoelectron spectrum (XPS) was collected on an ESCA-LAB-MKII spectrometer (UK) to confirm the elemental composition and valence states. High-resolution transmission electron microscopy (HR-TEM) images and elemental mapping of the materials were collected on a JEM-2100Plus instrument. The CEL-SPH2N photolysis water system was employed to test the photocatalytic hydrogen production performance of the materials. Transient photocurrent response tests were carried out using a CHI660E electrochemical workstation with a three-electrode system, in which a glassy carbon electrode was used as the working electrode, a platinum wire as the auxiliary electrode, and a Ag/AgCl electrode as the reference electrode. The preparation of the working electrode was based on published literature.<sup>[6]</sup>

## Calculation methods

Combining with the quantum chemistry method in the computer simulation technology, the Dmol3 module in the Materials Studio software package was used for the calculation. The Dmol3 method is widely used as an approach for determination of electronic structures and analysis of orbital electron occupations. The Perdew-Burke-Ernzerhof (PBE) parametrization of the generalized gradient approximation (GGA) was used for the electron exchange and correlation. In the calculation, the double numerical basis set plus orbital polarization function (DNP) was used to process the valence electron wave function. The iterative convergence criteria for energy, gradient, displacement, and Self-Consistent Field (SCF) under Medium accuracy were  $22 \times 10^{-5}$  Hartree,  $4 \times 10^{-3}$  Hartree/Å,  $5 \times 10^{-3}$  Å and  $1 \times 10^{-5}$  Hartree respectively.

## Supporting Figures

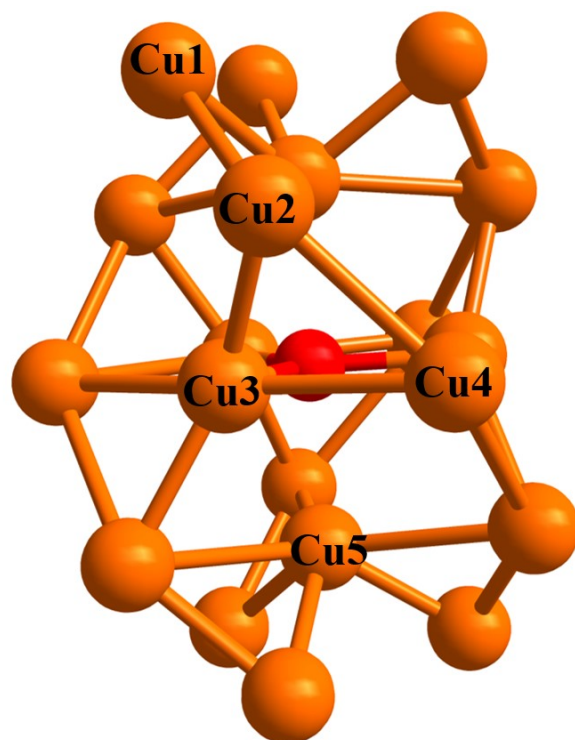

**Fig. S1** Ball-stick representation of 20-core copper(I) cluster in UJN- $\text{Cu}_{20}$  with labels of asymmetric copper atoms.

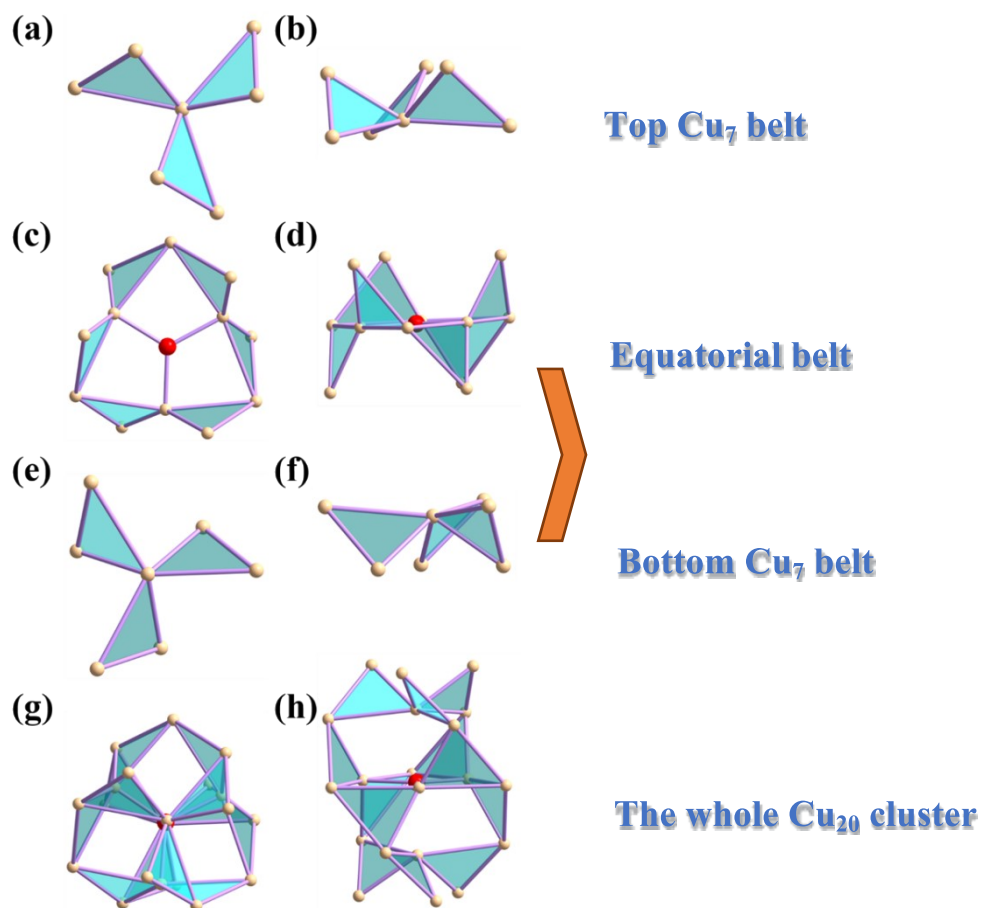

**Fig. S2** Top (a, c, e, g) and side (b, d, f, h) views of the Cu<sub>7</sub> belts, equatorial belt, and the whole Cu<sub>20</sub> cluster in UJN-Cu<sub>20</sub> with ligand atoms being omitted for clarity (color codes: Cu, yellow; O, red).



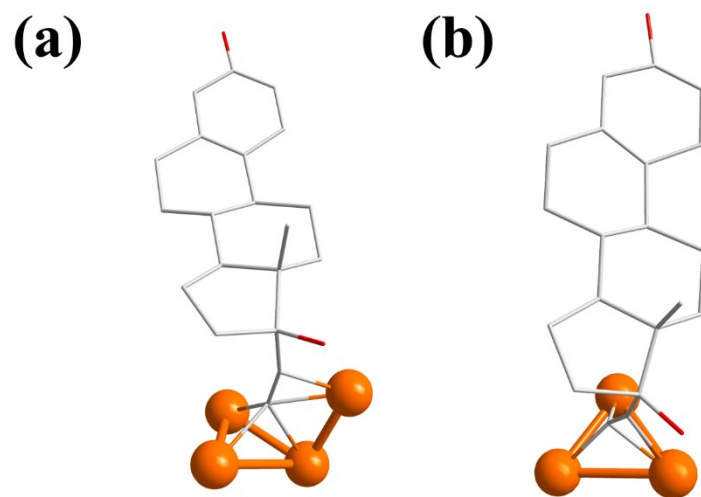

**Fig. S3** Coordination mode of ethinylestradiol ligand.

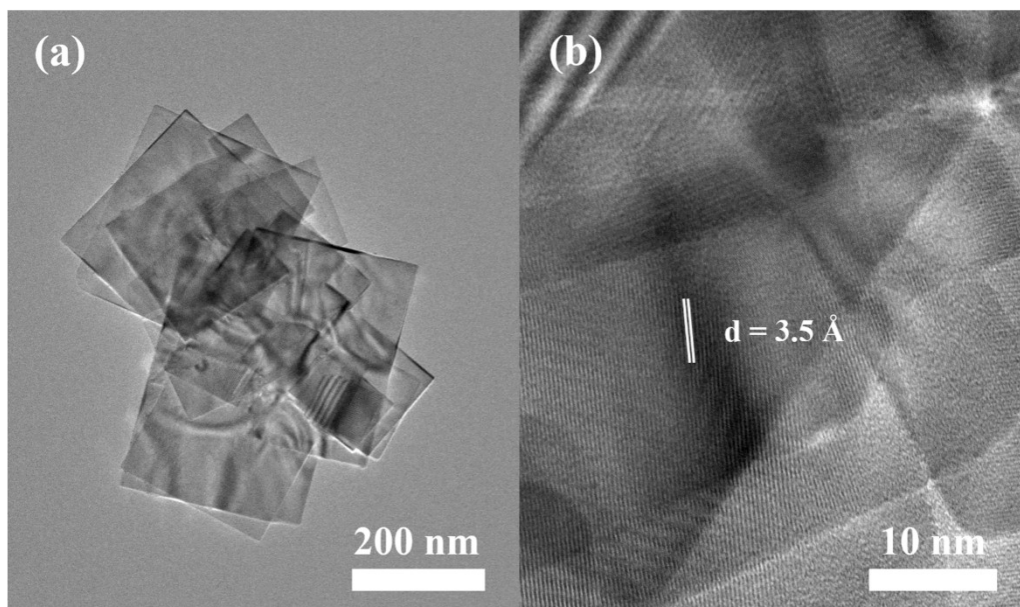

**Fig. S4** TEM (a) and HR-TEM (b) images of anatase  $\text{TiO}_2$ -NS.

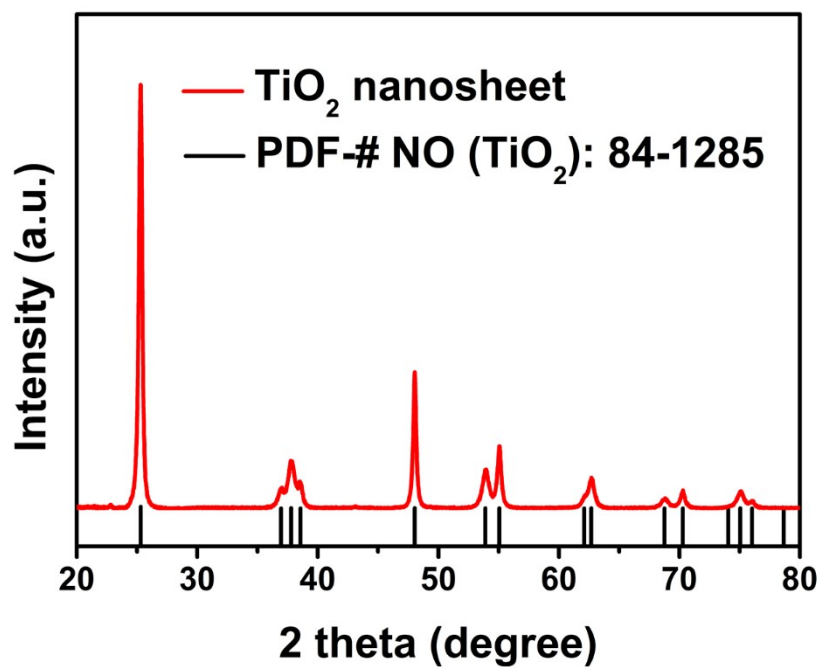

**Fig. S5** XRD pattern of **TiO<sub>2</sub>-NS** which is consistent with the characteristic peaks of anatase TiO<sub>2</sub>.

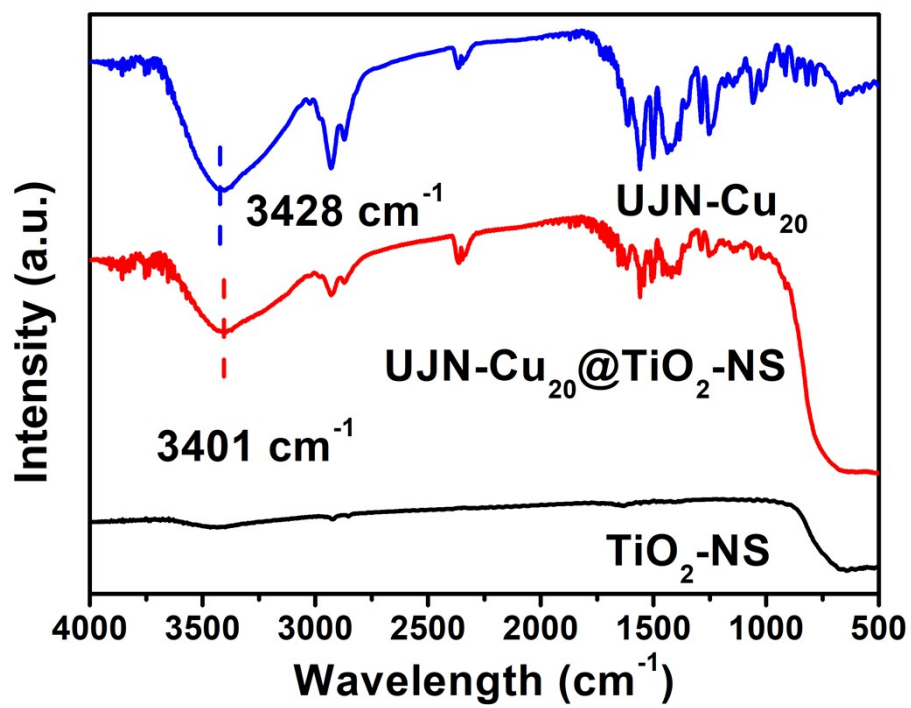

Fig. S6 FTIR spectra of UJN-Cu<sub>20</sub>, UJN-Cu<sub>20</sub>@TiO<sub>2</sub>-NS, and TiO<sub>2</sub>-NS.

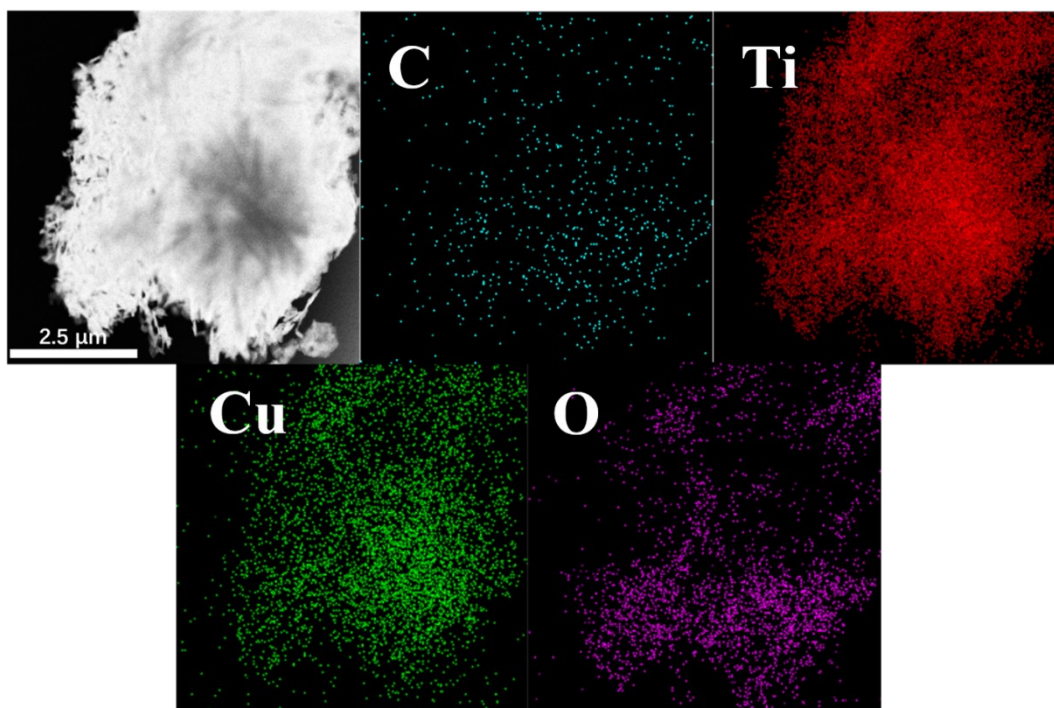

**Fig. S7** Elemental mapping images of UJN-Cu<sub>20</sub>@TiO<sub>2</sub>-NS.

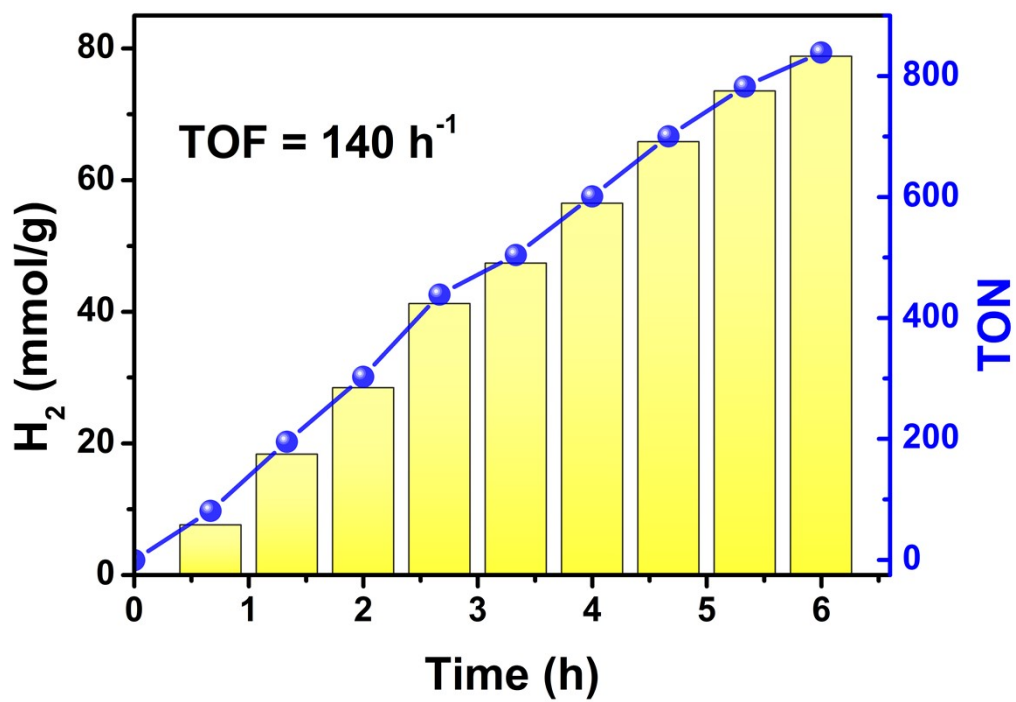

**Fig. S8** Turnover numbers and turnover frequency of **UJN-Cu<sub>20</sub>@TiO<sub>2</sub>-NS** catalyst.

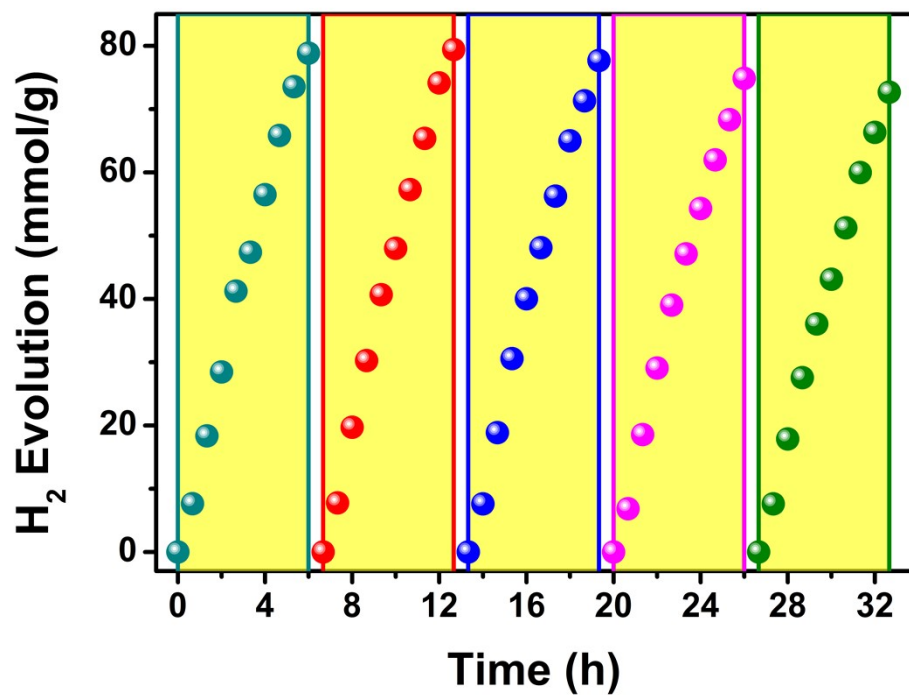

**Fig. S9** Stability test of photocatalytic hydrogen evolution of UJN-  
**Cu<sub>20</sub>@TiO<sub>2</sub>-NS** catalyst.

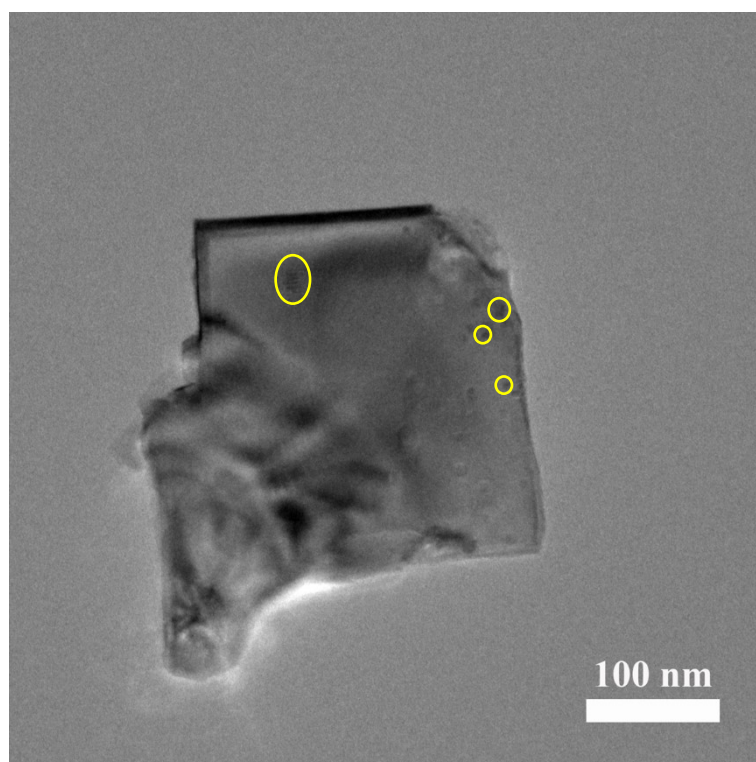

**Fig. S10** TEM image of **Cu<sub>14</sub>@TiO<sub>2</sub>-NS**.



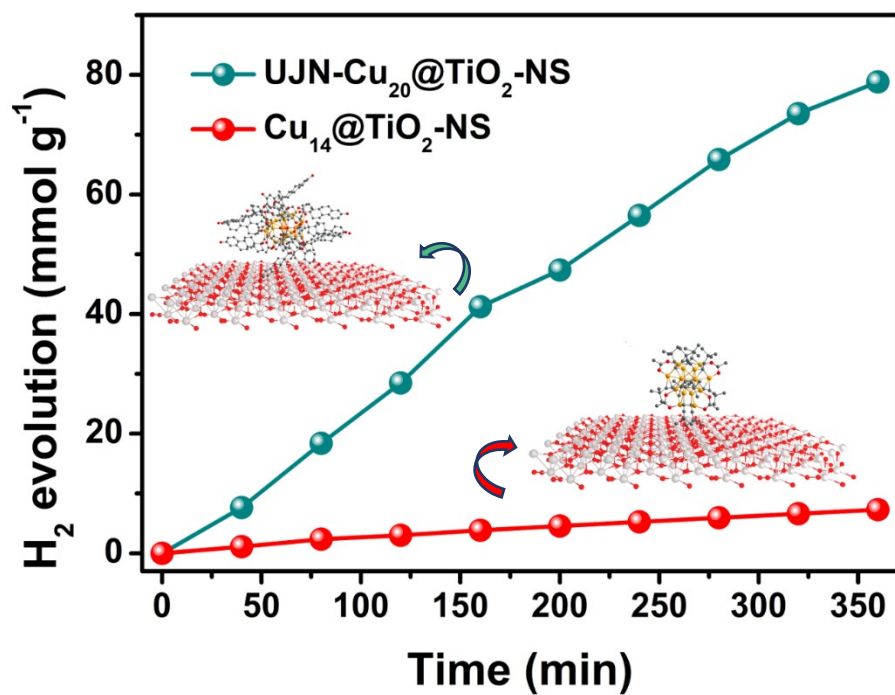

Fig. S11 Comparison of photocatalytic H<sub>2</sub> evolution properties between UJN-Cu<sub>20</sub>@TiO<sub>2</sub>-NS and Cu<sub>14</sub>@TiO<sub>2</sub>-NS.

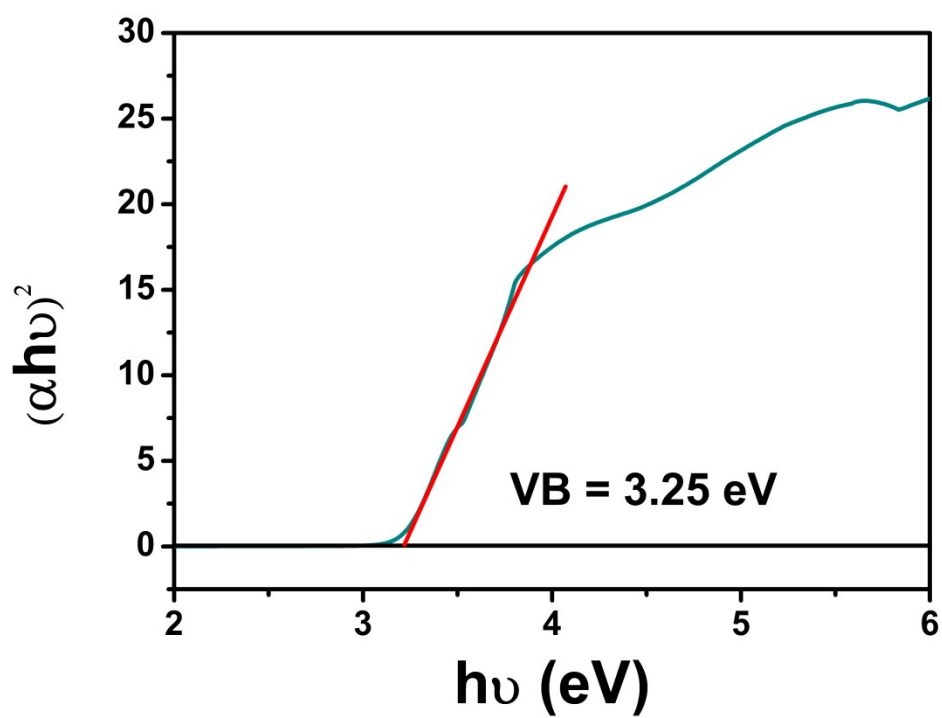

**Fig. S12** Band gap of  $\text{TiO}_2$ -NS calculated by UV-visible absorption spectra.

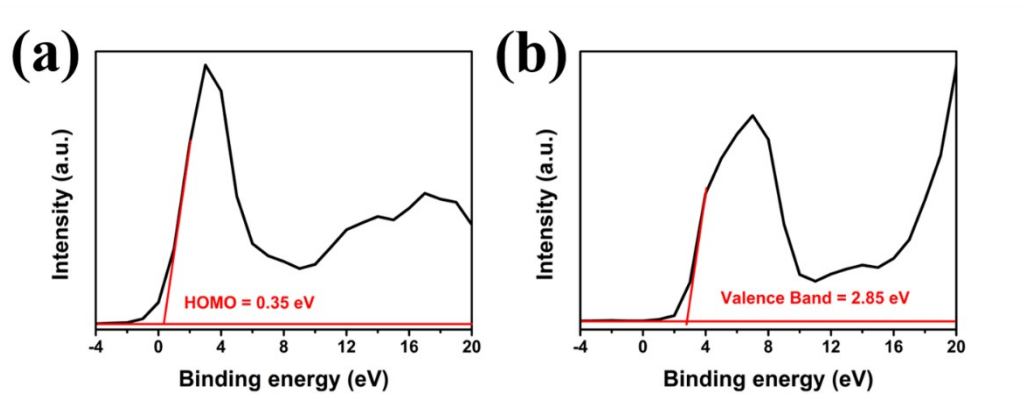

**Fig. S13** Valence band XPS spectra of **UJN-Cu<sub>20</sub>** (a) and **TiO<sub>2</sub>-NS** (b).

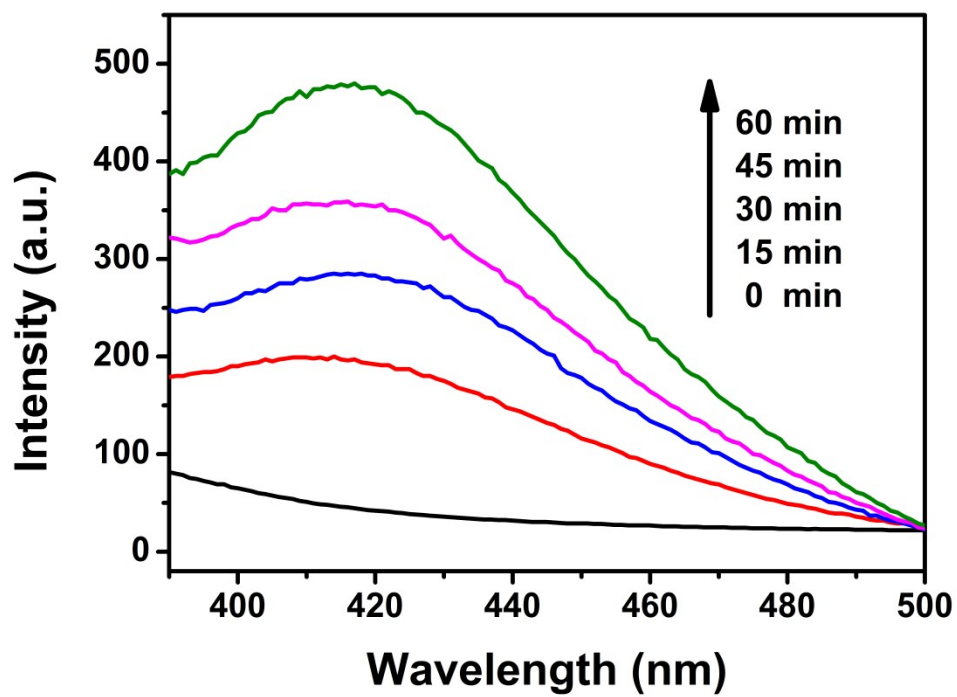

**Fig. S14** Fluorescence spectra of terephthalic acid with addition of UJN-  
 $\text{Cu}_{20}@\text{TiO}_2\text{-NS}$ .

**Reference**

- (1) X. Han, Q. Kuang, M. Jin, Z. Xie, L. Zheng, *J. Am. Chem. Soc.* **2009**, 131, 3152-3153.
- (2) CrysAlisPro 2012, Agilent Technologies. Version 1.171.36.31.
- (3) G. M. Sheldrick, *Acta Cryst. A* **2015**, 71, 3-8.
- (4) O. V. Dolomanov, L. J. Bourhis, R. J. Gildea, J. A. K. Howard, H. Puschmann, *J. Appl. Cryst.* **2009**, 42, 339-341.
- (5) K. Brandenburg, Diamond, 2010.
- (6) E. J. Popczun, J. R. Mckone, C. G. Read, A. J. Biacchi, A. M. Wiltrout, N. S. Lewis and R. E. Schaak. *J. Am. Chem. Soc.* **2013**, 135, 9267-9270.
